# Supplementary material for: Population Genetics, Genetic Structure, and Inbreeding of Commiphora gileadensis (L.) C. Chr Inferred from SSR Markers in Some Mountainous Sites of Makkah Province
Source: MDPI journal article supplement (doi:10.3390/plants12132506), 2023-06-30
Supplement: s1 [file s1]

**Table S1.** The tested primers status for *Commiphora gileadensis*.

| Marker  |                                                       | Ta(°C) | SSR motif                                 | Size of PCR product<br>s | References |
|---------|-------------------------------------------------------|--------|-------------------------------------------|--------------------------|------------|
| Prot02  | F: ATAAACCCTCTTACGGTGAG<br>R: GGGATTTGTTGACTTTGAAC    | 60/45  | (ACAT) <sub>6</sub>                       | 170–230                  | [19]       |
| Prot08  | F: TATGTCCCACAATGATCCTC<br>R: TTTATAGGAGCGCTCTGATC    | 60/45  | (ACAT) <sub>7</sub>                       | 186–242                  |            |
| Prot13  | F: TGATTTCCTTGTCCTCAAAGAG<br>R: AGCCACATACCGATAAACTC  | 60/45  | (AAAG) <sub>7</sub>                       | 309–311                  |            |
| Prot22  | F: TAACCCTTGACAAGCATTTTC<br>R: AAATTACGGCTTCAGAATTG   | 60/45  | (AGAT) <sub>9</sub>                       | 326–360                  |            |
| Prot28  | F: CGCAGTTTCAGAAATATCAG<br>R: GCATGATTTCGATGTTATAGG   | 60/45  | (ACAT) <sub>8</sub>                       | 238–261                  |            |
| Prot29  | F: TGAAGTACCTTTGCATGAC<br>R: AAGAGGGTGGTCTGAACTG      | 60/45  | (AAAG) <sub>15</sub>                      | 128–172                  |            |
| Prot67  | F: TCATGCTGTAATTCCTGTC<br>R: GAGAAGAGCAAAGATTCGATAG   | 60/45  | (ACAT) <sub>7</sub>                       | 191–239                  |            |
| Prot70  | F: CCATTATTAAGCATGCAAAC<br>R: CAATGGCCTGTTCATATAAAG   | 60/45  | (AAG) <sub>9</sub>                        | 111–255                  |            |
| Prot71  | F: CCATCCTCAGCTCTTACTTTC<br>R: GATCGGTCACAGATTCAATG   | 60/45  | (AAG) <sub>8</sub>                        | 398–422                  |            |
| Prot78  | F: CACACCAGGAAAGACTCAAG<br>R: TTGGAAGGAGGATTTATAGG    | 60/45  | (AAG) <sub>8</sub>                        | 139–148                  |            |
| Prot83  | F: CGTCTGGATGGAAGATAAAG<br>R: TCCTCGTTCTCCACTACAAC    | 60/45  | (AAC) <sub>10</sub>                       | 161–189                  |            |
| Prot97  | F: ATTCCGATTAAACCTCATTC<br>R: GGGTATGAGCTTGAATTAGG    | 60/45  | (AG) <sub>13</sub>                        | 166–196                  |            |
| Prot99  | F: ATGCTATGATAATCGGTTCC<br>R: GAAATGGTTGCACTTCACTC    | 60/45  | (AG) <sub>12</sub>                        | 149–209                  |            |
| Prot100 | F: ATCTCTCGTTCCAACCTCAAC<br>R: CGTCGAAGTACTCACCCTC    | 60/45  | (AC) <sub>10</sub>                        | 178–190                  |            |
| Prot101 | F: CATTTAGGGACCACGTTTAC<br>R: ATTGTTCCAGGATCTAGGTG    | 60/45  | (AG) <sub>11</sub>                        | 288–292                  |            |
| Prot102 | F: GTCGACCAAATAATGTCACC<br>R: ATGGACACACAGGACCTATC    | 60/45  | (AG) <sub>15</sub>                        | 370–388                  |            |
| Prot104 | F: TAACCGCAATATCAACTCTC<br>R: ACACCACGACTAAAGACTGG    | 60/45  | (AC) <sub>11</sub>                        | 281–299                  |            |
| BS6     | F: CTACGTATTGATGAGGCGGC<br>R: GAGATCGATGGAATTGCTGGT   | 60     | (GA) <sub>14</sub>                        | 178–239                  | [20]       |
| BS8     | F: CGCCTCAGCTCACCAGTAAT<br>R: CTGCCAGAGTATGAGAAGCAA   | 52     | (CAAAA) <sub>4... (CAA)<sub>4</sub></sub> | 180–210                  |            |
| BS10    | F: ACACGGGTCTGAACTCCAAC<br>R: GGATGATTCATTCCTGGAAAA   | 60     | (AAG) <sub>20</sub>                       | 198–222                  |            |
| BS11    | F: AACAACCAACCCATCTCACTC<br>R: GGTCGGTTGAGGATGGAATA   | 54     | (TC) <sub>7</sub>                         | 182–216                  |            |
| BS12    | F: ATCGGGTGATTCTGCTATCG<br>R: GCAGAATCGCTACTCGATGA    | 58     | (AG) <sub>9</sub>                         | 170–199                  |            |
| BS13    | F: TTCCTTGACATAGCCAAATCT<br>R: GTAGACCTAGCATCTTCAGCTG | 58     | (AG) <sub>11</sub>                        | 278–303                  |            |
| BS14    | F: CCGGCGCAACTTCAATAATA<br>R: ATCAGCAAGTCCGTCTGTCC    | 58     | (AAC) <sub>4</sub>                        | 192–222                  |            |
| BS16    | F: CGCTTTCTATTTTCCTTTTGG<br>R: GCTAACGATTGACAACCTGCTG | 50     | (CT) <sub>15</sub>                        | 112–144                  |            |

|                    |                                                          |      |                     |         |      |
|--------------------|----------------------------------------------------------|------|---------------------|---------|------|
| BS18               | F: CAACGAGAGGAGGCAGTGAT<br>R: TTAAGGCCTGGCTAGCAGAA       | 58   | (TC) <sub>30</sub>  | 188-202 |      |
| BS19               | F: GGATCCAGCCGCACTATATC<br>R: TCGACAGCTCAAGGAATGTG       | 56   | (TG) <sub>32</sub>  | 212-233 |      |
| BS21               | F: CAGCCTTCCTCAATCGGATA<br>R: AAGTCGGTCACCTCATTGGA       | 52   | (TGT) <sub>12</sub> | 211-233 |      |
| BS23               | F: CACGATGACGTGATTCTGCT<br>R: CAAGCTTGACACACAGGAAAA      | 52   | (CA) <sub>9</sub>   | 191-266 |      |
| BS25               | F: TCAAGCCGTTGTAGTTGGTG<br>R: TGGAAGCACAGAAAGAAGCA       | 52   | (TC) <sub>15</sub>  | 200-244 |      |
| BS28               | F: CCAGCATTTTTCTTTCTTTTT<br>R: TTGCTCACGAAATCCTTCCT      | 56   | (AAG) <sub>13</sub> | 154-181 |      |
| BS29               | F: CACGATGACGTGATTCTGCT<br>R: CTTACACCATCTCCCTCTGC       | 52   | (AG) <sub>9</sub>   | 178-238 |      |
| BS32               | F: CTGCCAGGCCTTAAACAAAA<br>R: GCAGTGGATGGGGTAGAATC       | 60   | (TG) <sub>17</sub>  | 240-277 |      |
| Santri04           | F: AGCAGTGTTGGTTCAGGAGAA<br>R: AGCTTCTGCTCCACCTGATG      | 63.7 | (TG) <sub>9</sub>   | 133-148 | [21] |
| Santri07           | F: CAGCATGAGGTTGATTGGAC<br>R: CAACCTTGCTACTGTTTCG        | 62.4 | (CA) <sub>8</sub>   | 188-233 |      |
| Santri10           | F: Q4-AAGAGAAGCATGGATGACGG<br>R: TGAGGTGGTCCAGACTTTCC    | 63.7 | (AG) <sub>11</sub>  | 202-247 |      |
| Santri15           | F: TTCATCTGGGTCAGCCGTAT<br>R: CTCACAATCCCGCTTCTC         | 62.3 | (GAA) <sub>8</sub>  | 267-288 |      |
| Santri16           | F: Q3-GAATCCATCTTCCCTTAGCAG<br>R: CCATTGAGTTGCCTCCAAAT   | 61.8 | (TTC) <sub>8</sub>  | 266-322 |      |
| Santri20           | F: GCCCTTCTAAGAAATCACCCA<br>R: CATTACACGAGCATTACATT      | 61.7 | (CA) <sub>8</sub>   | 370-412 |      |
| Santri26           | F: Q3-CTTGATTCTTCTTGACGG<br>R: CACGAGGGATGAGAGCAACT      | 64.9 | (TC) <sub>10</sub>  | 152-168 |      |
| DaE-14             | F: GGCGGCCATGTTTGTGAAAT<br>R: TACGTAACGGCGATTCACTTT      | 53   | (AT) <sub>8</sub>   | 122-139 | [22] |
| DaE-24             | F: AGGCGTAGAAATCCCATCCA<br>R: ATCTCCAGGAACGGTTGACT       | 53   | (AT) <sub>8</sub>   | 150-163 |      |
| DaE-34             | F: TGTGTTTCTCCGCCTCACA<br>R: ATGAACTGCAGCCTCAAACG        | 53   | (AT) <sub>7</sub>   | 169-190 |      |
| DaE-5 <sup>c</sup> | F: AGGATGTTGGTCTGTTGGTGG<br>R: TGGCAGAGGAGAGGATAAGCA     | 53   | (AT) <sub>8</sub>   | 101-152 |      |
| DaE-7              | F: AAGAAGGCAAGGCAACACC<br>R: CAGAGCACACTGTAAGGCA         | 53   | (AG) <sub>8</sub>   | 110-163 |      |
| DaE-28             | F: CAGAGGTGGAATCTTAA<br>GCCA<br>R: AACACTGCTTCAGCTTTCAGA | 53   | (AG) <sub>15</sub>  | 151-172 |      |
| DaE-39             | F: ACCCATTTGAGCTCATTTGACA<br>R: TGCCACTGGGAGTAGAAGAGT    | 53   | (AT) <sub>16</sub>  | 169-216 |      |
| DaE-13             | F: ATGGCCATTCTCACACCTGG<br>R: ACAGTTGATTTCCATTCCACCC     | 53   | (AT) <sub>7</sub>   | 138-169 |      |
| DaE-19             | F: GCAAGATTGTGGTGTGCTGT<br>R: GTGACTCGGAGAAAGCGGT        | 53   | (AAC) <sub>9</sub>  | 118-157 |      |
| DaE-27             | F: TTCAATATTGTGGCTGGTCCCA<br>R: TCAGCTCTCAGACAAAGGCA     | 53   | (AG) <sub>15</sub>  | 150-213 |      |
| DaE-36             | F: TCATTGAGCCACAAGGGAAC<br>R: ACAGAGGAGTGTGATCGAAGA      | 53   | (AT) <sub>10</sub>  | 160-223 |      |
| DaE-41             | F: TGGTTACTTCAAGCACAGAGAC<br>R: CTGCAATATCGATGCCCTCTCT   | 53   | (AT) <sub>11</sub>  | 199-252 |      |
| DaE-16             | F: CTAATCGTACTGCTCTTGC<br>R: GGAATGACCGTGTGTTTGGG        | 53   | (AG) <sub>20</sub>  | 115-166 |      |

|        |                                                        |    |                    |         |
|--------|--------------------------------------------------------|----|--------------------|---------|
| DaE-20 | F: AGATCCCTCTGAATCCCTGATT<br>R: TCATGTCTTCCCTCTTTAGGCT | 53 | (AT) <sub>9</sub>  | 130–191 |
| DaE-23 | F: CAGCGAACCCATGTCAAACG<br>R: TCCTCAAAGCTACCCTATCCCA   | 53 | (AG) <sub>13</sub> | 133–248 |

---
